# Supplementary material for: Screen versus cyclone for improved capacity and robustness for sidestream and mainstream deammonification
Source: Royal Society of Chemistry journal article supplement (doi:10.1039/c9ew00384c), 2019-01-01
Supplement: c9ew00384c2.pdf [file c9ew00384c2.pdf]

## Screen versus cyclone for improved capacity and robustness for sidestream and mainstream deammonification

*Tim Van Winckel*<sup>a,b,c</sup>, *Siegfried E. Vlaeminck*<sup>a,d\*</sup>, *Ahmed Al-Omari*<sup>b</sup>, *Benjamin Bachmann*<sup>e</sup>,  
*Belinda Sturm*<sup>c</sup>, *Bernhard Wett*<sup>f</sup>, *Imre Takács*<sup>g</sup>, *Charles Bott*<sup>h</sup>, *Sudhir N. Murthy*<sup>i</sup> and *Haydée De Clippeleir*<sup>b</sup>

<sup>a</sup> *Center of Microbial Ecology and Technology (CMET), Faculty of Bioscience Engineering, Ghent University, Ghent, Belgium*

<sup>b</sup> *District of Columbia Water and Sewer Authority, Blue Plains Advanced Wastewater Treatment Plant, 5000 Overlook Ave, SW Washington, DC 20032, USA*

<sup>c</sup> *Department of Civil, Environmental and Architectural engineering, The University of Kansas, KS, USA*

<sup>d</sup> *Research Group of Sustainable Energy, Air and Water Technology, Department of Bioscience Engineering, University of Antwerp, Antwerpen, Belgium*

<sup>e</sup> *Department of Microbiology; University of Innsbruck, Austria*

<sup>f</sup> *ARA consult GmbH, Austria*

<sup>g</sup> *Dynamita SARL, France*

<sup>h</sup> *Hampton Roads Sanitation District, VA, USA*

<sup>i</sup> *New Hub, VA, USA*

\* *Corresponding author: [siegfried.vlaeminck@uantwerpen.be](mailto:siegfried.vlaeminck@uantwerpen.be)*

## Supplemental B

Capacity in sidestream can be estimated by the volumetric ammonium removal rate ( $\text{g NH}_4^+\text{-N/m}^3\text{/d}$ ), which can be calculated by dividing the AnAOB net growth rate by the AnAOB yield ( $\text{g COD/g N}$ ) (Eq. B1). The AnAOB volumetric removal rate is obtained multiplying the net growth rate  $\mu_{net, AnAOB}$  ( $\text{d}^{-1}$ ) with the AnAOB concentration in the reactor  $X_{AnAOB}$  ( $\text{g COD/m}^3$ ).

$$r_{V, AnAOB} = \frac{\mu_{net, AnAOB} * X_{AnAOB}}{Y_{AnAOB}} \quad (\text{B1})$$

The AnAOB concentration can be determined by solving an AnAOB-specific substrate mass balance for ammonium (Eq B2.) (Metcalf & Eddy, 2003):

$$X_{AnAOB} = \left( \frac{\theta_{AnAOB}}{HRT} \right) \left( \frac{Y_{AnAOB} * (S_o - S_{out})}{1 + \theta_{AnAOB} * b_{AnAOB}} \right) \quad (\text{B2})$$

Where  $\theta_{AnAOB}$  is the SRT for AnAOB as calculated in Eq. 5 (d),  $HRT$  the hydraulic retention time of the reactor (d),  $S_o$  the influent substrate ( $\text{g NH}_4^+\text{-N/m}^3$ ),  $S_{out}$  the residual substrate level ( $\text{g NH}_4^+\text{-N/m}^3$ ),  $b_{AnAOB}$  the decay rate for AnAOB ( $\text{d}^{-1}$ ), and  $Y_{AnAOB}$  the AnAOB yield ( $\text{g COD/g N}$ ). Formation of ammonium through hydrolysis was not taken into consideration. Inserting Eq B2. in Eq B1. results in an equation independent of AnAOB concentration or yield (Eq. B3):

$$r_{V, AnAOB} = \mu_{net, AnAOB} \left( \frac{\theta_{AnAOB}}{HRT} \right) \left( \frac{(S_o - S_{out})}{1 + \theta_{AnAOB} * b_{AnAOB}} \right) \quad (\text{B3})$$
