# Supplementary material for: Screen versus cyclone for improved capacity and robustness for sidestream and mainstream deammonification
Source: Royal Society of Chemistry journal article supplement (doi:10.1039/c9ew00384c), 2019-01-01
Supplement: c9ew00384c3.pdf [file c9ew00384c3.pdf]

## Screen versus cyclone for improved capacity and robustness for sidestream and mainstream deammonification

*Tim Van Winckel*<sup>a,b,c</sup>, *Siegfried E. Vlaeminck*<sup>a,d\*</sup>, *Ahmed Al-Omari*<sup>b</sup>, *Benjamin Bachmann*<sup>e</sup>,  
*Belinda Sturm*<sup>c</sup>, *Bernhard Wett*<sup>f</sup>, *Imre Takács*<sup>g</sup>, *Charles Bott*<sup>h</sup>, *Sudhir N. Murthy*<sup>i</sup> and *Haydée De Clippeleir*<sup>b</sup>

<sup>a</sup> *Center of Microbial Ecology and Technology (CMET), Faculty of Bioscience Engineering, Ghent University, Ghent, Belgium*

<sup>b</sup> *District of Columbia Water and Sewer Authority, Blue Plains Advanced Wastewater Treatment Plant, 5000 Overlook Ave, SW Washington, DC 20032, USA*

<sup>c</sup> *Department of Civil, Environmental and Architectural engineering, The University of Kansas, KS, USA*

<sup>d</sup> *Research Group of Sustainable Energy, Air and Water Technology, Department of Bioscience Engineering, University of Antwerp, Antwerpen, Belgium*

<sup>e</sup> *Department of Microbiology; University of Innsbruck, Austria*

<sup>f</sup> *ARA consult GmbH, Austria*

<sup>g</sup> *Dynamita SARL, France*

<sup>h</sup> *Hampton Roads Sanitation District, VA, USA*

<sup>i</sup> *New Hub, VA, USA*

\* *Corresponding author: [siegfried.vlaeminck@uantwerpen.be](mailto:siegfried.vlaeminck@uantwerpen.be)*

## Supplemental C:

Proof for Equation 14.

$$f_{deam} * \frac{S_{TIN,in} * Q_{in}}{2.32 * V} * \left(1 - \frac{S_{TIN,out}}{S_{TIN,in}}\right) = \mu_{min,AnAOB} \left( \frac{SRT_{AnAOB}}{HRT} \right) \left( \frac{(S_{NH_4^+,in} - S_{NH_4^+,out})}{1 + \theta_{AnAOB} * b_{AnAOB}} \right) \Leftrightarrow$$

$$f_{deam} * \frac{S_{TIN,in}}{2.32 * HRT} * \left(1 - \frac{S_{TIN,out}}{S_{TIN,in}}\right) = \mu_{min,AnAOB} \left( \frac{SRT_{AnAOB}}{HRT} \right) \left( \frac{(S_{NH_4^+,in} - S_{NH_4^+,out})}{1 + SRT_{AnAOB} * b_{AnAOB}} \right) \Leftrightarrow$$

$$\mu_{min,AnAOB} = \frac{f_{deam} * \frac{S_{TIN,in}}{2.32} * \left(1 - \frac{S_{TIN,out}}{S_{TIN,in}}\right)}{(S_{NH_4^+,in} - S_{NH_4^+,out}) \left( \frac{SRT_{AnAOB}}{1 + SRT_{AnAOB} * b_{AnAOB}} \right)} \Leftrightarrow$$

$$\mu_{min,AnAOB} = \frac{f_{deam} * \frac{S_{TIN,in}}{2.32} * \left(1 - \frac{S_{TIN,out}}{S_{TIN,in}}\right)}{\left(f_{deam} * \frac{S_{TIN,in}}{2.32} - 0\right) \left( \frac{SRT_{AnAOB}}{1 + SRT_{AnAOB} * b_{AnAOB}} \right)} \Leftrightarrow$$

$$\mu_{min,AnAOB} = \frac{\left(1 - \frac{S_{TIN,out}}{S_{TIN,in}}\right)}{\left( \frac{SRT_{AnAOB}}{1 + SRT_{AnAOB} * b_{AnAOB}} \right)}$$
