# Supplementary material for: Screen versus cyclone for improved capacity and robustness for sidestream and mainstream deammonification
Source: Royal Society of Chemistry journal article supplement (doi:10.1039/c9ew00384c), 2019-01-01
Supplement: c9ew00384c4.pdf [file c9ew00384c4.pdf]

## Screen versus cyclone for improved capacity and robustness for sidestream and mainstream deammonification

*Tim Van Winckel*<sup>a,b,c</sup>, *Siegfried E. Vlaeminck*<sup>a,d\*</sup>, *Ahmed Al-Omari*<sup>b</sup>, *Benjamin Bachmann*<sup>e</sup>,  
*Belinda Sturm*<sup>c</sup>, *Bernhard Wett*<sup>f</sup>, *Imre Takács*<sup>g</sup>, *Charles Bott*<sup>h</sup>, *Sudhir N. Murthy*<sup>i</sup> and *Haydée De Clippeleir*<sup>b</sup>

<sup>a</sup> *Center of Microbial Ecology and Technology (CMET), Faculty of Bioscience Engineering, Ghent University, Ghent, Belgium*

<sup>b</sup> *District of Columbia Water and Sewer Authority, Blue Plains Advanced Wastewater Treatment Plant, 5000 Overlook Ave, SW Washington, DC 20032, USA*

<sup>c</sup> *Department of Civil, Environmental and Architectural engineering, The University of Kansas, KS, USA*

<sup>d</sup> *Research Group of Sustainable Energy, Air and Water Technology, Department of Bioscience Engineering, University of Antwerp, Antwerpen, Belgium*

<sup>e</sup> *Department of Microbiology; University of Innsbruck, Austria*

<sup>f</sup> *ARA consult GmbH, Innsbruck, Austria*

<sup>g</sup> *Dynamita SARL, France*

<sup>h</sup> *Hampton Roads Sanitation District, VA, USA*

<sup>i</sup> *New Hub, VA, USA*

\* *Corresponding author: [siegfried.vlaeminck@uantwerpen.be](mailto:siegfried.vlaeminck@uantwerpen.be)*

## Supplemental D:

**Table D1.** Kinetic parameters used in model. Adapted from the calibrated model in Al-Omari et al. (2015).

| <b>Parameter</b> | <b>Unit</b>       | <b>AOB</b> | <b>NOB</b> | <b>AnAOB</b> |
|------------------|-------------------|------------|------------|--------------|
| $\mu_{max}$      | $d^{-1}$          | 0.9        | 0.7        | 0.1          |
| $K_{NH_4}$       | $mg\ N\ L^{-1}$   | 0.7        | -          | 0.5          |
| $K_{NO_2}$       | $mg\ N\ L^{-1}$   | -          | 0.05       | 0.5          |
| $K_o$            | $mg\ O_2\ L^{-1}$ | 0.4 (0.25) | 0.14 (0.5) | -            |
| $d_{aer}$        | $d^{-1}$          | 0.17       | 0.17       | 0.019        |
| $d_{an}$         | $d^{-1}$          | 0.08       | 0.08       | 0.0095       |
