# Supplementary material for: Screen versus cyclone for improved capacity and robustness for sidestream and mainstream deammonification
Source: Royal Society of Chemistry journal article supplement (doi:10.1039/c9ew00384c), 2019-01-01
Supplement: c9ew00384c6.pdf [file c9ew00384c6.pdf]

## Screen versus cyclone for improved capacity and robustness for sidestream and mainstream deammonification

*Tim Van Winckel<sup>a,b,c</sup>, Siegfried E. Vlaeminck<sup>a,d\*</sup>, Ahmed Al-Omari<sup>b</sup>, Benjamin Bachmann<sup>e</sup>, Belinda Sturm<sup>c</sup>, Bernhard Wett<sup>f</sup>, Imre Takács<sup>g</sup>, Charles Bott<sup>h</sup>, Sudhir N. Murthy<sup>i</sup> and Haydée De Clippeleir<sup>b</sup>*

<sup>a</sup> *Center of Microbial Ecology and Technology (CMET), Faculty of Bioscience Engineering, Ghent University, Ghent, Belgium*

<sup>b</sup> *District of Columbia Water and Sewer Authority, Blue Plains Advanced Wastewater Treatment Plant, 5000 Overlook Ave, SW Washington, DC 20032, USA*

<sup>c</sup> *Department of Civil, Environmental and Architectural engineering, The University of Kansas, KS, USA*

<sup>d</sup> *Research Group of Sustainable Energy, Air and Water Technology, Department of Bioscience Engineering, University of Antwerp, Antwerpen, Belgium*

<sup>e</sup> *Department of Microbiology; University of Innsbruck, Austria*

<sup>f</sup> *ARA consult GmbH, Austria*

<sup>g</sup> *Dynamita SARL, France*

<sup>h</sup> *Hampton Roads Sanitation District, VA, USA*

<sup>i</sup> *New Hub, VA, USA*

\* *Corresponding author: [siegfried.vlaeminck@uantwerpen.be](mailto:siegfried.vlaeminck@uantwerpen.be)*

## Supplemental F

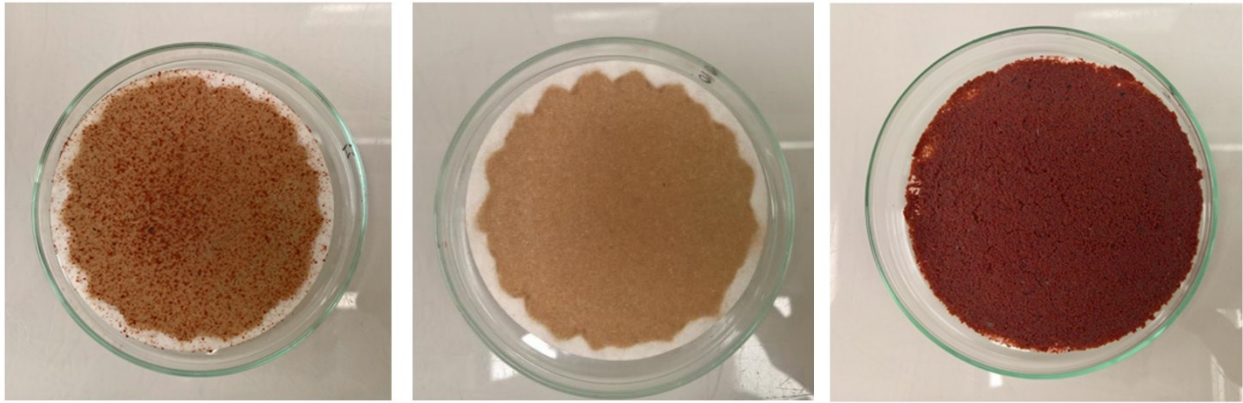

**Figure F1.** Sidestream deammonification sludge passed through a screen. From left to right: Mixed liquor, pass-through (reject) and retained.

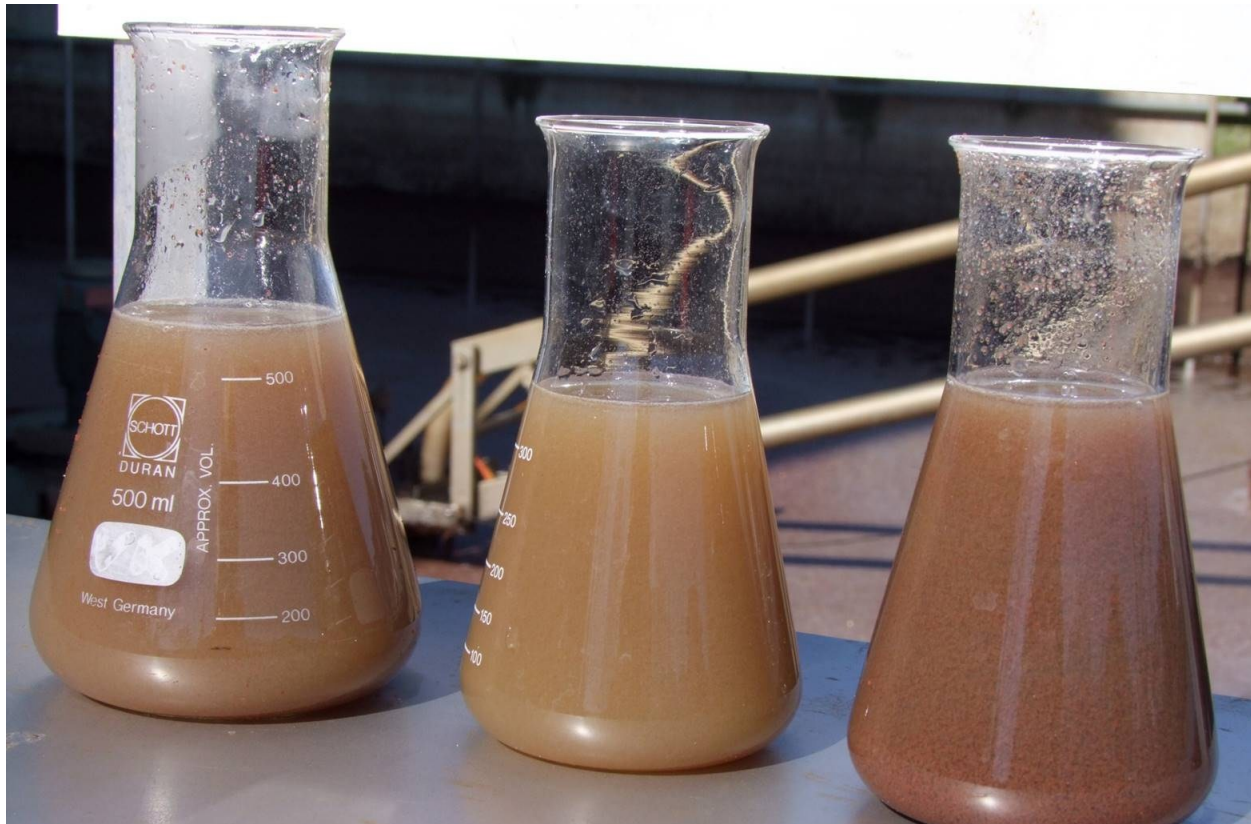

**Figure F2.** Sidestream deammonification sludge passed through a cyclone. From left to right: Mixed liquor, overflow (reject) and underflow (retained).

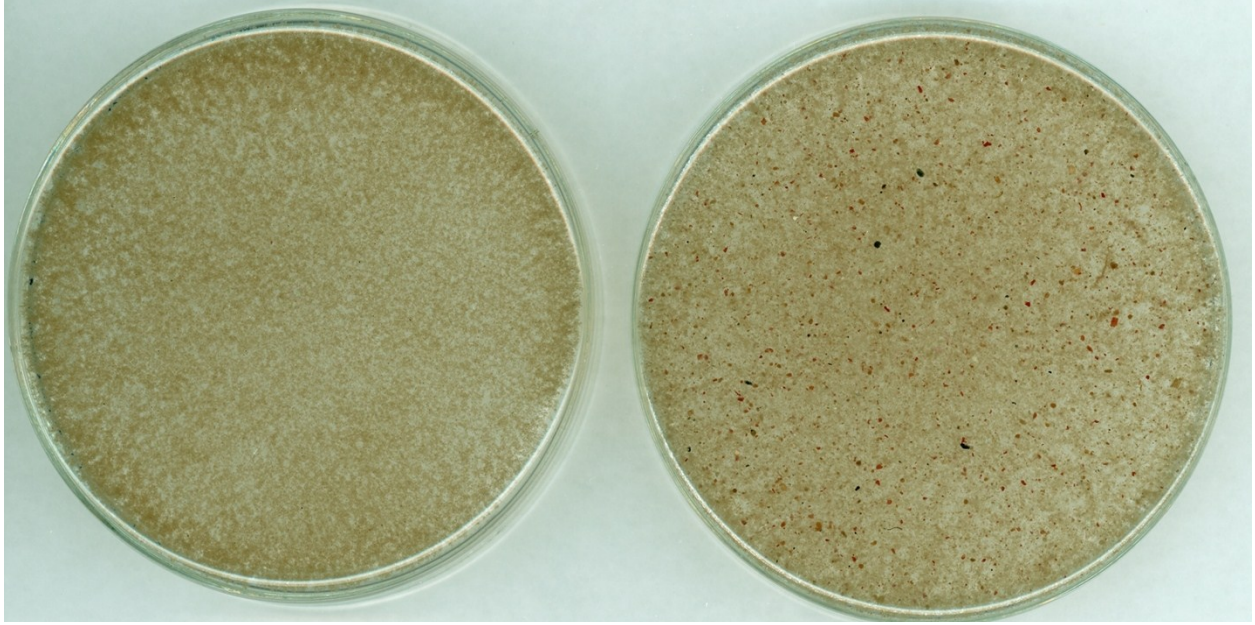

**Figure F3** Mainstream deammonification sludge passed through a screen. From left to right: overflow (reject) and underflow (retained).
